# Supplementary material for: Real-world retrospective observational study exploring the effectiveness and safety of antifibrotics in idiopathic pulmonary fibrosis
Source: HighWire-hosted journal article supplement (doi:10.1136/bmjresp-2020-000782), 2021-03-01
Supplement: bmjresp-2020-000782supp001_data_supplement.pdf [file bmjresp-2020-000782supp001_data_supplement.pdf]

**A real world retrospective observational study exploring the effectiveness and safety of antifibrotics in idiopathic pulmonary fibrosis**  
**Wright WA et al.**

**Online Supplementary Material**

Supplementary Figure 1: Consort diagram showing the process of patient inclusion and exclusion from analyses in the antifibrotic and control groups. 'Both antifibrotics' include patients who switched from one antifibrotic to another. ILD – interstitial lung disease, MDT – multi-disciplinary team, IPF – idiopathic pulmonary fibrosis, FVC – forced vital capacity.

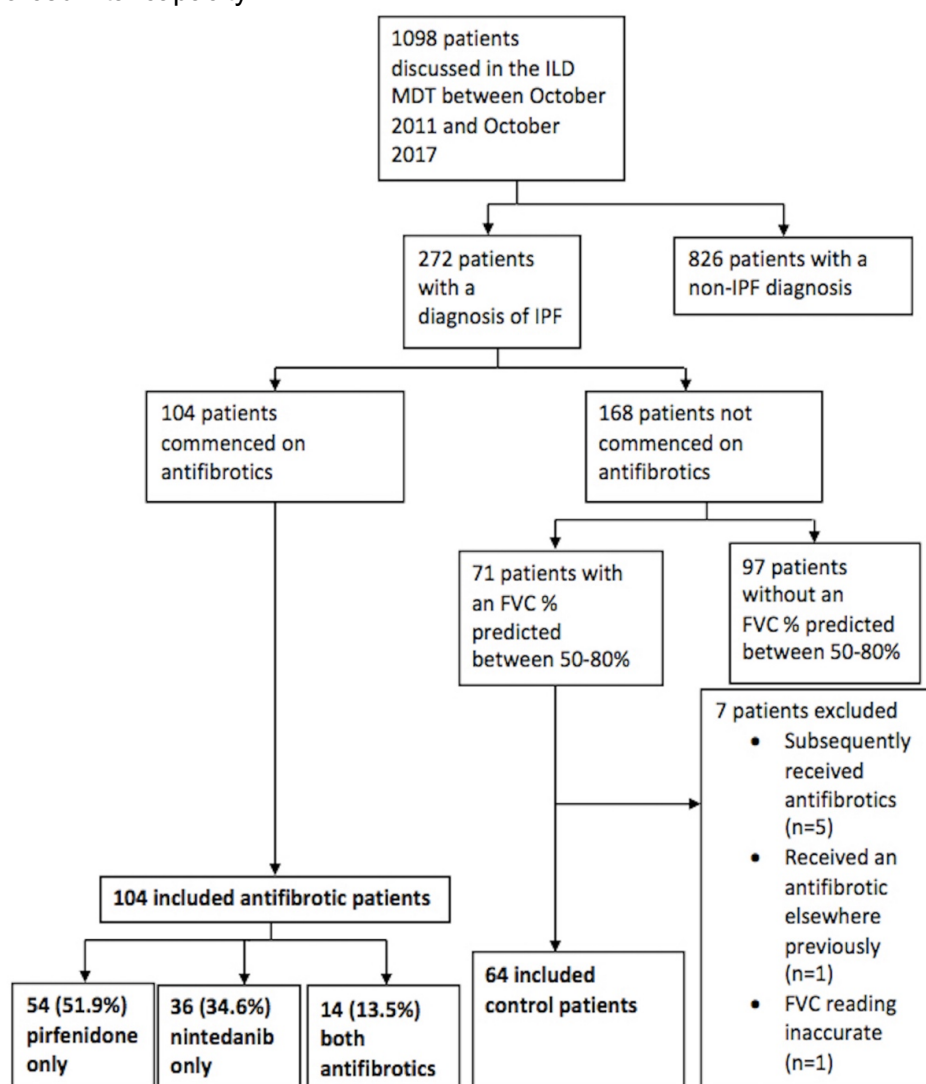

Supplementary Table 1: Baseline characteristics of the patients who commenced pirfenidone first compared to those who commenced nintedanib first. IQR – interquartile range, BMI – body mass index, FVC - Forced vital capacity, DLco – diffusion capacity for carbon monoxide, Kco -carbon monoxide transfer coefficient, SpO<sub>2</sub> – pulse oximetry.

| Characteristic                             |                | Pirfenidone<br>(n=62) | Nintedanib<br>(n=42) | P value      |
|--------------------------------------------|----------------|-----------------------|----------------------|--------------|
| Male sex – no. (%)                         |                | 45 (72.6)             | 34 (81.0)            | 0.327        |
| Age – mean (SD)                            |                | 69.9 (8.7)            | 72.6 (7.7)           | 0.108        |
| Smoking status (%)                         |                |                       |                      |              |
|                                            | Never          | 19 (31.1)             | 14 (34.1)            |              |
|                                            | Ex-smoker      | 40 (65.6)             | 27 (65.9)            |              |
|                                            | Current smoker | 2 (3.2)               | 0 (0.0)              |              |
| Smoking pack years (IQR)                   |                | 17 (25)               | 8 (25)               | 0.381        |
| Weight – Kg (SD)                           |                | 81.8 (18.4)           | 77.3 (12.0)          | 0.197        |
| BMI (IQR)                                  |                | 28.70 (6.27)          | 28.09 (4.70)         | 0.113        |
| External referral (%)                      |                | 35 (56.5)             | 22 (52.4)            | 0.682        |
| Oxygen therapy (%)                         |                |                       |                      |              |
|                                            | LTOT           | 7 (11.3)              | 1 (2.4)              | 0.094        |
|                                            | Ambulatory     | 8 (12.9)              | 7 (16.7)             | 0.592        |
| Previous triple therapy (%)                |                | 5 (8.1)               | 0 (0.0)              | 0.059        |
| <b>Previous corticosteroid therapy (%)</b> |                | <b>17 (27.4)</b>      | <b>3 (7.1)</b>       | <b>0.010</b> |
| Histological diagnosis (%)                 |                | 8 (12.9)              | 8 (19.0)             | 0.394        |
| FVC – L (SD)                               |                | 2.25 (0.50)           | 2.27 (0.53)          | 0.860        |
| FVC % predicted (SD)                       |                | 65.8 (9.3)            | 64.7 (8.5)           | 0.532        |
| DLco – mmol/min/kPa (IQR)                  |                | 3.21 (1.28)           | 3.48 (1.81)          | 0.215        |
| DLco % predicted (SD)                      |                | 41.5 (13.0)           | 45.2 (11.9)          | 0.167        |
| Kco – mmol/min/kPa/L (SD)                  |                | 1.04 (0.32)           | 1.13 (0.31)          | 0.219        |
| Kco % predicted (SD)                       |                | 77.5 (23.4)           | 84.7 (23.7)          | 0.153        |
| SpO <sub>2</sub> – % (IQR)                 |                | 94 (5)                | 94 (4)               | 0.582        |
| Emphysema on HRCT (%)                      |                | 7                     | 7                    | 0.431        |

Supplementary Table 2: Effect of antifibrotic treatment on mortality at 6, 12 and 18 months with adjustment for independent predictors of mortality for each time point. Adjustment for baseline BMI  $\leq 25$  baseline and predicted DLco  $\leq 35\%$  at 12 and 18 months. Adjustment for DLco  $\leq 35\%$ , Baseline eGFR  $\leq 50$ , Baseline neutrophil : lymphocyte ratio  $\geq 5$  at 6 months.

|                                           | Odds ratio (CI)  | P Value |
|-------------------------------------------|------------------|---------|
| Antifibrotic treatment 6-month mortality  | 0.44 (0.14-1.31) | 0.140   |
| Antifibrotic treatment 12-month mortality | 0.56 (0.24-1.30) | 0.178   |
| Antifibrotic treatment 18-month mortality | 0.59 (0.27-1.32) | 0.199   |

### Univariate and multivariate analysis for 12-month mortality

Supplementary Table 3: Univariate analysis for 12-month mortality. Supplementary oxygen is patients on either LTOT or ambulatory oxygen therapy.

| Variable                                                | N          | Odds ratio (CI)         | Likelihood ratio | P value          |
|---------------------------------------------------------|------------|-------------------------|------------------|------------------|
| Age $\geq 75$                                           | 168        | 1.91 (0.97-3.74)        | 3.56             | 0.059            |
| Male gender                                             | 168        | 1.32 (0.59-2.95)        | 0.45             | 0.507            |
| <b>Baseline BMI <math>\leq 25</math></b>                | <b>166</b> | <b>3.69 (1.81-7.53)</b> | <b>13.12</b>     | <b>&lt;0.001</b> |
| Baseline FVC % predicted $\leq 65\%$                    | 167        | 1.39 (0.71-2.71)        | 0.90             | 0.342            |
| <b>Baseline DLco % predicted <math>\leq 35\%</math></b> | <b>154</b> | <b>4.50 (2.11-9.59)</b> | <b>15.68</b>     | <b>&lt;0.001</b> |
| Baseline oxygen saturations $\leq 94\%$                 | 162        | 1.63 (0.81-3.28)        | 1.93             | 0.166            |
| Baseline PPI treatment                                  | 168        | 0.95 (0.49-1.85)        | 0.02             | 0.876            |
| Baseline statin treatment                               | 168        | 1.23 (0.63-2.40)        | 0.36             | 0.551            |
| <b>Baseline supplementary oxygen</b>                    | <b>168</b> | <b>2.50 (1.09-5.76)</b> | <b>4.54</b>      | <b>0.028</b>     |
| Prior steroid therapy                                   | 168        | 0.78 (0.29-2.11)        | 0.24             | 0.628            |
| Baseline eGFR $\leq 50$                                 | 167        | 1.47 (0.66-3.27)        | 0.87             | 0.344            |
| Baseline neutrophil : lymphocyte ratio $\geq 5$         | 166        | 1.94 (0.87-4.32)        | 2.52             | 0.104            |
| Baseline platelet count $\leq 200$                      | 167        | 1.51 (0.75-3.04)        | 1.33             | 0.246            |

### Supplementary Table 4: Multivariate analysis for 12-month mortality

| Variable                            | Odds ratio (CI)  | P value |
|-------------------------------------|------------------|---------|
| Baseline BMI $\leq 25$              | 3.30 (1.44-7.59) | 0.005   |
| Baseline DLco % predicted $\leq 35$ | 3.30 (1.44-7.59) | 0.005   |

### Supplementary Table 5: Multivariate analysis for 6-month mortality

| Variable                                        | Odds ratio (CI)   | P value |
|-------------------------------------------------|-------------------|---------|
| Baseline DLco % predicted $\leq 35$             | 4.34 (1.47-13.12) | 0.008   |
| Baseline eGFR $\leq 50$                         | 4.51 (1.39-14.57) | 0.012   |
| Baseline neutrophil : lymphocyte ratio $\geq 5$ | 3.63 (1.14-11.55) | 0.029   |

Supplementary Table 6: Multivariate analysis for 18-month mortality

| Variable                            | Odds ratio (CI)  | P value |
|-------------------------------------|------------------|---------|
| Baseline BMI $\leq 25$              | 2.96 (1.33-6.57) | 0.008   |
| Baseline DLco % predicted $\leq 35$ | 3.83 (1.73-8.51) | 0.001   |

Supplementary Table 7: Multivariate analysis for 12-month mortality including only antifibrotic-treated patients

| Variable                                           | Odds ratio (CI)    | P value |
|----------------------------------------------------|--------------------|---------|
| Baseline BMI $\leq 25$                             | 14.40 (3.68-56.34) | <0.001  |
| Baseline platelet count $\leq 200$                 | 4.09 (1.13-14.77)  | 0.031   |
| Discontinuation of an antifibrotic within 3 months | 6.26 (1.54-25.52)  | 0.010   |

### Univariate and multivariate analysis for PFS

Supplementary Table 8: Univariate analysis for 12-months PFS

| Variable                                        | N          | Odds ratio (CI)         | Likelihood ratio | P value      |
|-------------------------------------------------|------------|-------------------------|------------------|--------------|
| <b>Age <math>\geq 75</math></b>                 | <b>168</b> | <b>0.48 (0.26-0.90)</b> | <b>5.32</b>      | <b>0.022</b> |
| Male gender                                     | 168        | 0.75 (0.37-1.54)        | 0.61             | 0.435        |
| <b>Baseline BMI <math>\leq 25</math></b>        | <b>166</b> | <b>0.40 (0.20-0.79)</b> | <b>7.23</b>      | <b>0.008</b> |
| Baseline FVC % predicted $\leq 65\%$            | 167        | 1.41 (0.76-2.62)        | 1.17             | 0.279        |
| Baseline DLco % predicted $\leq 35\%$           | 154        | 0.56 (0.28-1.11)        | 2.79             | 0.096        |
| Baseline oxygen saturations $\leq 94\%$         | 162        | 0.71 (0.38-1.33)        | 1.16             | 0.283        |
| Baseline PPI treatment                          | 168        | 0.59 (0.32-1.10)        | 2.82             | 0.094        |
| Baseline statin treatment                       | 168        | 1.08 (0.59-1.99)        | 0.07             | 0.798        |
| Baseline supplementary oxygen                   | 168        | 0.44 (0.18-1.06)        | 3.64             | 0.061        |
| Prior steroid therapy                           | 168        | 1.91 (0.79-4.58)        | 2.11             | 0.145        |
| Baseline eGFR $\leq 50$                         | 167        | 0.96 (0.45-2.05)        | 0.01             | 0.917        |
| Baseline neutrophil : lymphocyte ratio $\geq 5$ | 166        | 0.70 (0.32-1.54)        | 0.81             | 0.370        |
| Baseline platelet count $\leq 200$              | 167        | 0.83 (0.43-1.59)        | 0.32             | 0.573        |

Supplementary Table 9: Multivariate analysis for 12-month PFS

| Variable      | Odds ratio (CI)  | P value |
|---------------|------------------|---------|
| Age $\geq 75$ | 2.12 (1.08-4.14) | 0.029   |

Supplementary Table 10: 12-month PFS with antifibrotic treatment, adjusting for age  $>75$ 

| Variable               | Odds ratio (CI)  | P value |
|------------------------|------------------|---------|
| Age $\geq 75$          | 1.79 (0.93-3.44) | 0.081   |
| Antifibrotic treatment | 0.60 (0.31-1.18) | 0.139   |

**Multivariate analysis for 6-month PFS**

No significant results.

**Multivariate analysis for 18-month PFS**

No significant results.

**Antifibrotic discontinuation univariate and multivariate analysis**

Supplementary Table 11: Univariate analysis for antifibrotic discontinuation by 12 months

| Variable                        | N          | Odds ratio (CI)          | Likelihood ratio | P value      |
|---------------------------------|------------|--------------------------|------------------|--------------|
| <b>Age ≥75</b>                  | <b>104</b> | <b>2.35 (1.02-5.38)</b>  | <b>4.13</b>      | <b>0.042</b> |
| <b>Female sex</b>               | <b>104</b> | <b>3.07 (1.20-7.82)</b>  | <b>5.75</b>      | <b>0.016</b> |
| <b>Baseline BMI ≤25</b>         | <b>102</b> | <b>4.33 (1.66-11.28)</b> | <b>9.73</b>      | <b>0.002</b> |
| Baseline supplementary oxygen   | 104        | 1.80 (0.67-4.80)         | 1.38             | 0.239        |
| Baseline DLco % predicted ≤35   | 96         | 2.07 (0.87-4.94)         | 2.74             | 0.097        |
| Baseline FVC % predicted ≤65    | 103        | 0.75 (0.34-1.63)         | 0.54             | 0.463        |
| Baseline oxygen saturations ≤94 | 101        | 1.50 (0.68-3.32)         | 1.01             | 0.316        |
| Baseline eGFR ≤50               | 104        | 1.59 (0.59-4.31)         | 0.82             | 0.362        |
| Baseline platelet count ≤200    | 104        | 1.78 (0.77-4.13)         | 1.82             | 0.176        |

Supplementary Table 12: Multivariate analysis for antifibrotic discontinuation by 12 months

| Variable         | Odds ratio (CI)   | P value |
|------------------|-------------------|---------|
| Age ≥75          | 3.17 (1.16-8.68)  | 0.025   |
| Female sex       | 4.57 (1.40-14.88) | 0.012   |
| Baseline BMI ≤25 | 3.74 (1.22-11.53) | 0.021   |
